# Supplementary material
Source: MDPI journal article supplement (https://www.mdpi.com/2504-477X/8/5/189)
Supplement: s1 [file s1]

## (Supplementary Information)

### **Li<sub>2</sub>SnO<sub>3</sub> Li-ion Hybrid Supercapacitors Converted from Pastes Containing LiCl-SnCl<sub>2</sub> Liquid Precursor Using an Atmospheric-Pressure Plasma Jet**

**Hong-Kai Chen**<sup>1,2</sup>, **Heng-Min Chang**<sup>1,2</sup>, **Bo-Yan Hong**<sup>1,2</sup>, **Shuo-En Yu**<sup>3</sup>, **I-Chih Ni**<sup>4</sup>,  
**Chih-I Wu**<sup>3,4,5</sup>, **Cheng-Che Hsu**<sup>6</sup>, **I-Chun Cheng**<sup>6</sup> and **Jian-Zhang Chen**<sup>1,2,3,\*</sup>

- <sup>1</sup> Institute of Applied Mechanics, National Taiwan University, Taipei City 10617, Taiwan; r10543001@ntu.edu.tw (H.-K.C.); r11543014@ntu.edu.tw (H.-M.C.)  
<sup>2</sup> Advanced Research Center for Green Materials Science and Technology, National Taiwan University, Taipei City 10617, Taiwan  
<sup>3</sup> Graduate School of Advanced Technology, National Taiwan University, Taipei City 10617, Taiwan; fl1k45004@ntu.edu.tw (S.-E.Y.); chihwu@ntu.edu.tw (C.-I.W.)  
<sup>4</sup> Graduate Institute of Photonics and Optoelectronics, National Taiwan University, Taipei City 10617, Taiwan; ichihni@ntu.edu.tw  
<sup>5</sup> Department of Electrical Engineering, National Taiwan University, Taipei City 10617, Taiwan  
<sup>6</sup> Department of Chemical Engineering, National Taiwan University, Taipei City 10617, Taiwan; chsu@ntu.edu.tw (C.-C.H.); iccheng@ntu.edu.tw (I.-C.C.)  
\* Correspondence: jchen@ntu.edu.tw

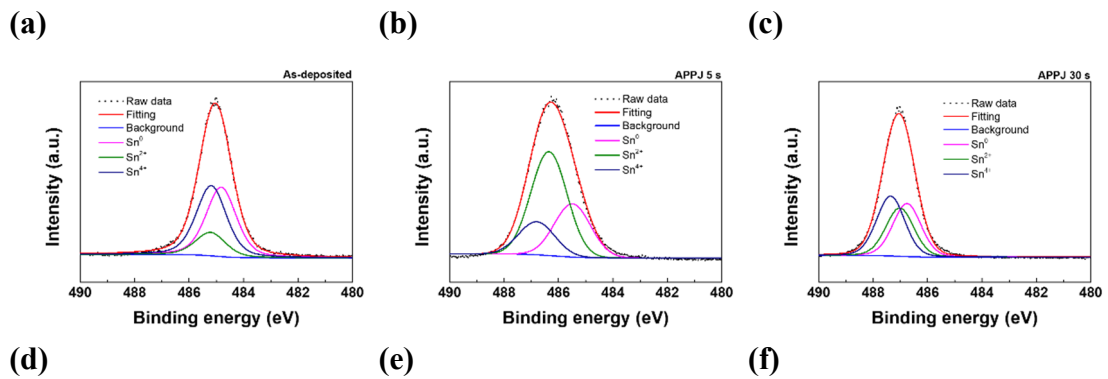

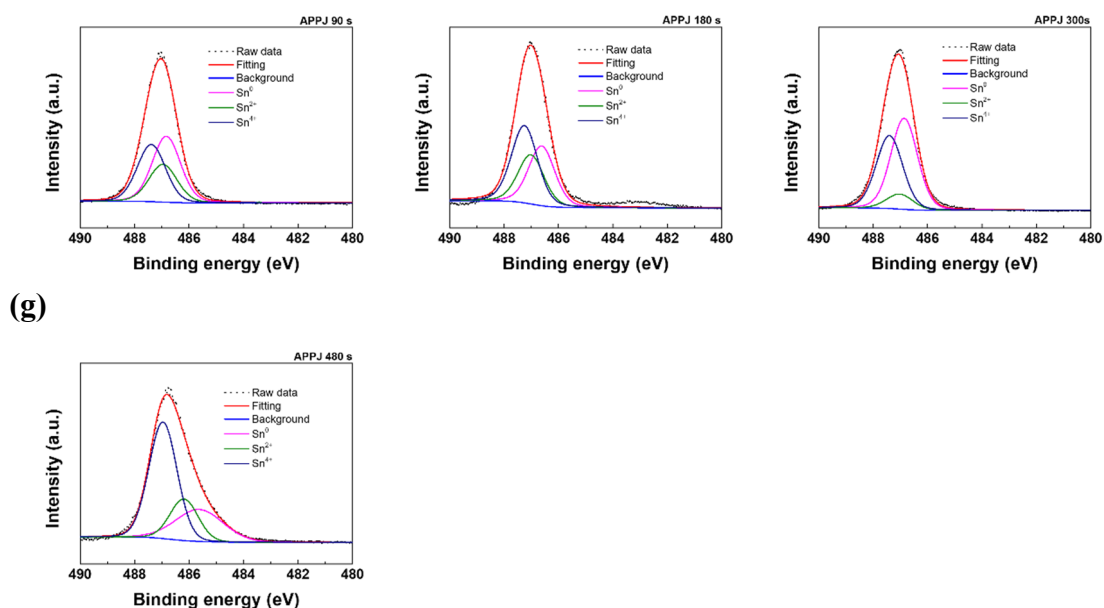

**Figure S1** O1s fine-scan spectra of  $\text{Li}_2\text{SnO}_3$  electrodes processed by APPJ for (a) 0 s, (b) 5 s, (c) 30 s, (d) 90 s, (e) 180 s, (f) 300 s, and (g) 480 s.

**Table S1** Bonding contents obtained from XPS analysis of  $\text{Sn}3d^{5/2}$ .

|                     | $\text{Sn}^{0+}$ (at. %) | $\text{Sn}^{2+}$ (at. %) | $\text{Sn}^{4+}$ (at. %) |
|---------------------|--------------------------|--------------------------|--------------------------|
| <b>As-deposited</b> | 40.41                    | 17.67                    | 42.92                    |
| <b>APPJ 5 s</b>     | 32.10                    | 41.54                    | 26.36                    |
| <b>APPJ 30 s</b>    | 32.92                    | 29.95                    | 37.13                    |
| <b>APPJ 90 s</b>    | 41.27                    | 23.64                    | 35.09                    |
| <b>APPJ 180 s</b>   | 27.98                    | 54.64                    | 17.38                    |
| <b>APPJ 300 s</b>   | 50.91                    | 8.39                     | 40.70                    |
| <b>APPJ 480 s</b>   | 25.58                    | 19.57                    | 54.85                    |

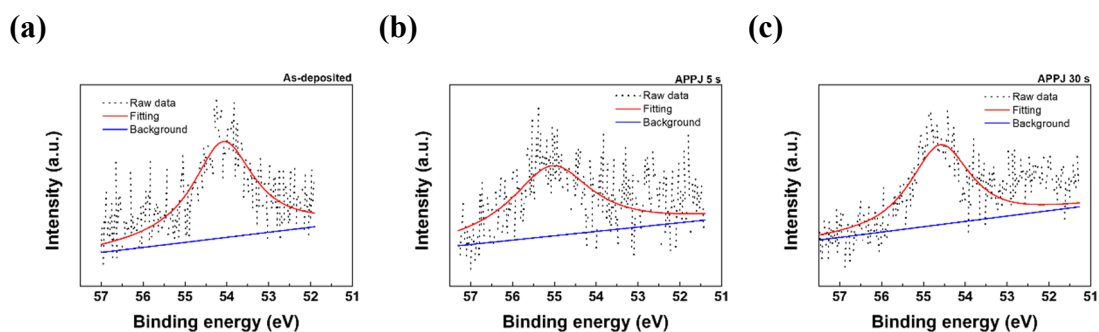

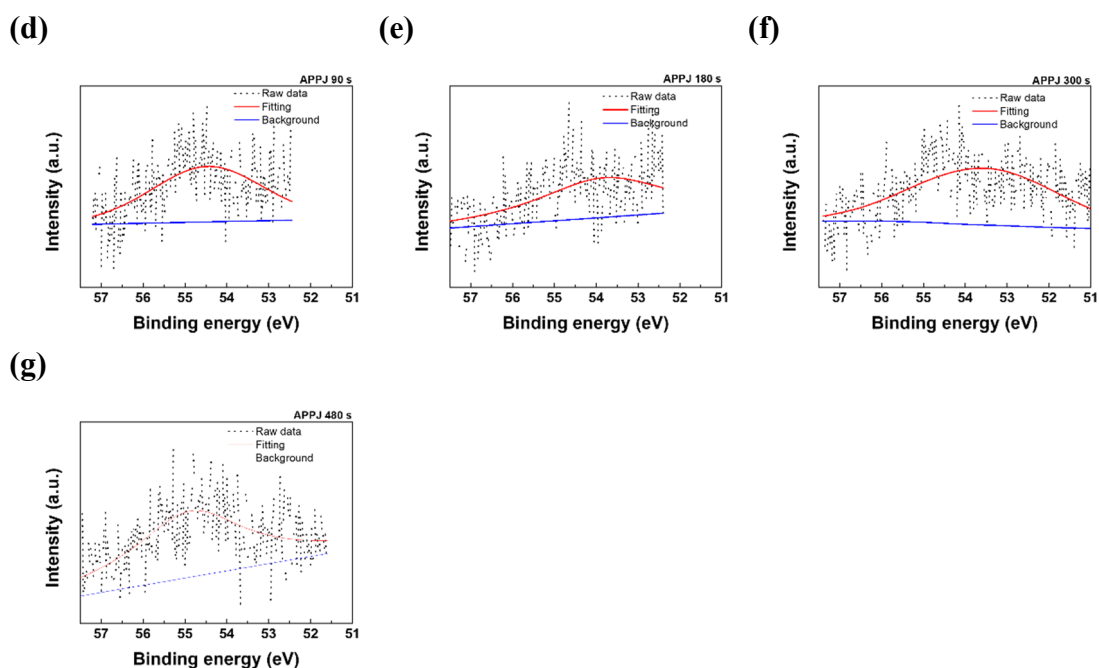

**Figure S2** Li 1s fine-scan spectra of  $\text{Li}_2\text{SnO}_3$  electrodes processed by APPJ for (a) 0 s, (b) 5 s, (c) 30 s, (d) 90 s, (e) 180 s, (f) 300 s, and (g) 480 s.

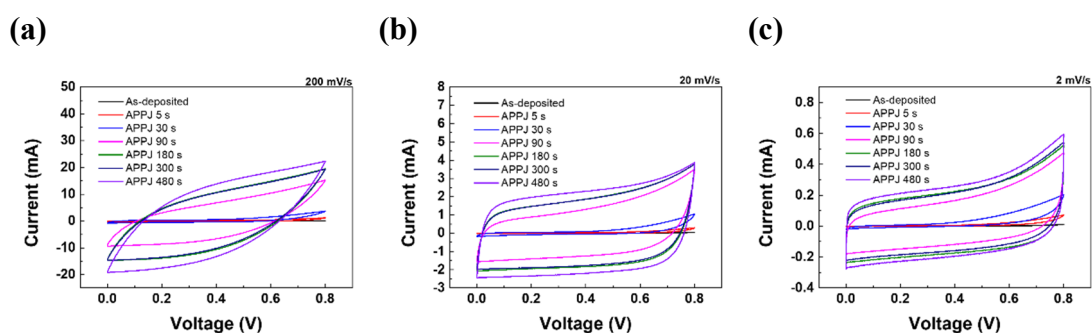

**Figure S3** CV curves for  $\text{Li}_2\text{SnO}_3$  Li-HSCs under potential scan rates of (a) 200 mV/s, (b) 20 mV/s, and (c) 2 mV/s in two-electrode symmetric system.

**Table S2** Areal capacity of  $\text{Li}_2\text{SnO}_3$  Li-HSCs calculated based on CV results in two-electrode symmetric system.

| Areal capacity ( $\text{mC}/\text{cm}^2$ ) |          |         |        |
|--------------------------------------------|----------|---------|--------|
| Potential scan rate                        | 200 mV/s | 20 mV/s | 2 mV/s |

|                     |        |        |        |
|---------------------|--------|--------|--------|
| <b>As-deposited</b> | 0.032  | 0.081  | 0.096  |
| <b>APPJ 5 s</b>     | 0.432  | 0.616  | 1.128  |
| <b>APPJ 30 s</b>    | 2.080  | 2.813  | 4.880  |
| <b>APPJ 90 s</b>    | 13.440 | 32.096 | 38.504 |
| <b>APPJ 180 s</b>   | 20.688 | 38.064 | 45.752 |
| <b>APPJ 300 s</b>   | 21.512 | 44.936 | 50.888 |
| <b>APPJ 480 s</b>   | 25.681 | 55.664 | 61.584 |

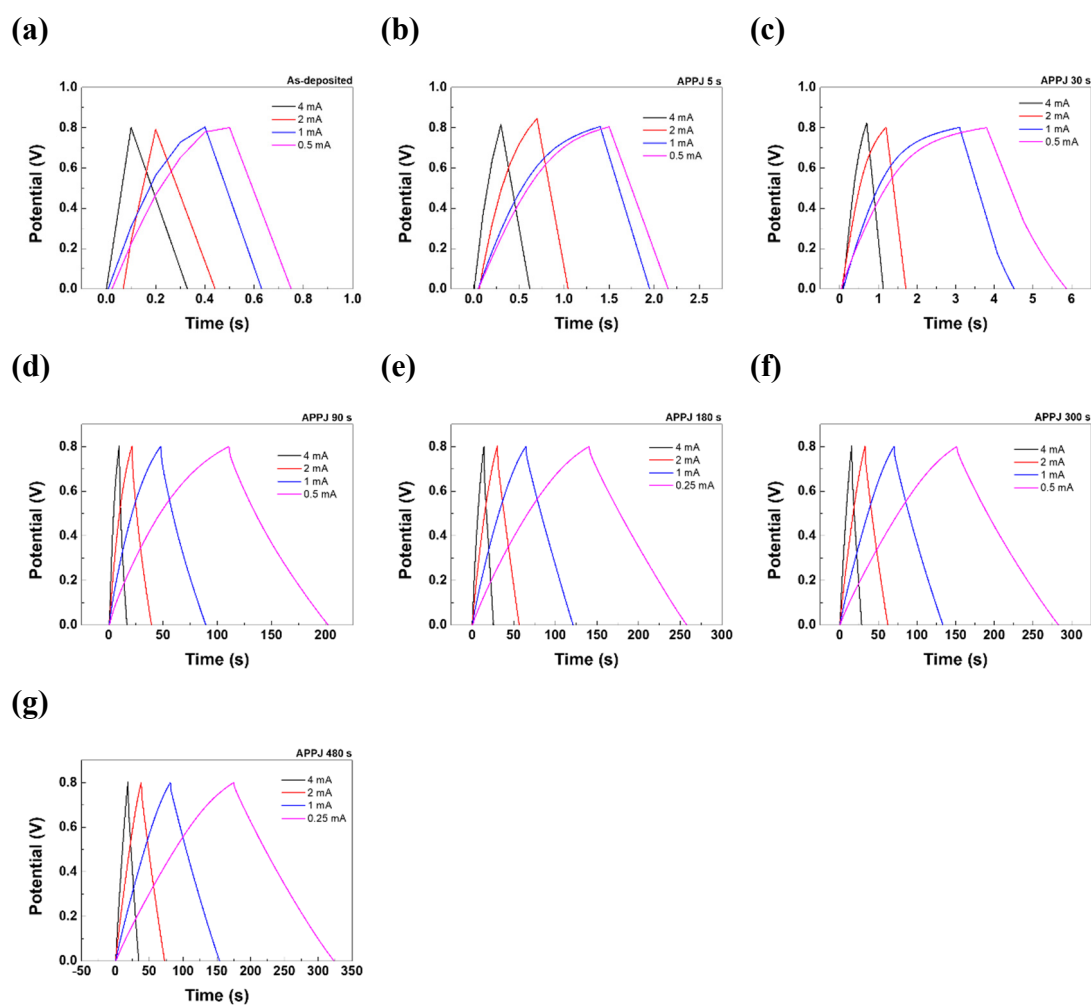

**Figure S4** GCD curves of (a) untreated Li-HSCs and Li-HSCs processed by APPJ

for (b) 5 s, (c) 30 s, (d) 90 s, (e) 180 s, (f) 300 s, and (g) 480 s.

**Table S3** Areal capacity of  $\text{Li}_2\text{SnO}_3$  Li-HSCs calculated based on GCD results in two-electrode symmetric system.

| Charging/<br>Discharging current | Areal capacity ( $\mu\text{A h/cm}^2$ ) |        |        |        |
|----------------------------------|-----------------------------------------|--------|--------|--------|
|                                  | 4 mA                                    | 2 mA   | 1mA    | 0.5 mA |
| As-deposited                     | 0.082                                   | 0.169  | 0.189  | 0.253  |
| APPJ 5 s                         | 0.087                                   | 0.171  | 0.338  | 0.462  |
| APPJ 30 s                        | 0.201                                   | 0.273  | 0.344  | 0.682  |
| APPJ 90 s                        | 5.369                                   | 6.687  | 7.729  | 8.493  |
| APPJ 180 s                       | 8.580                                   | 9.778  | 10.509 | 11.101 |
| APPJ 300 s                       | 9.671                                   | 10.924 | 11.751 | 12.204 |
| APPJ 480 s                       | 11.776                                  | 12.847 | 13.516 | 13.973 |

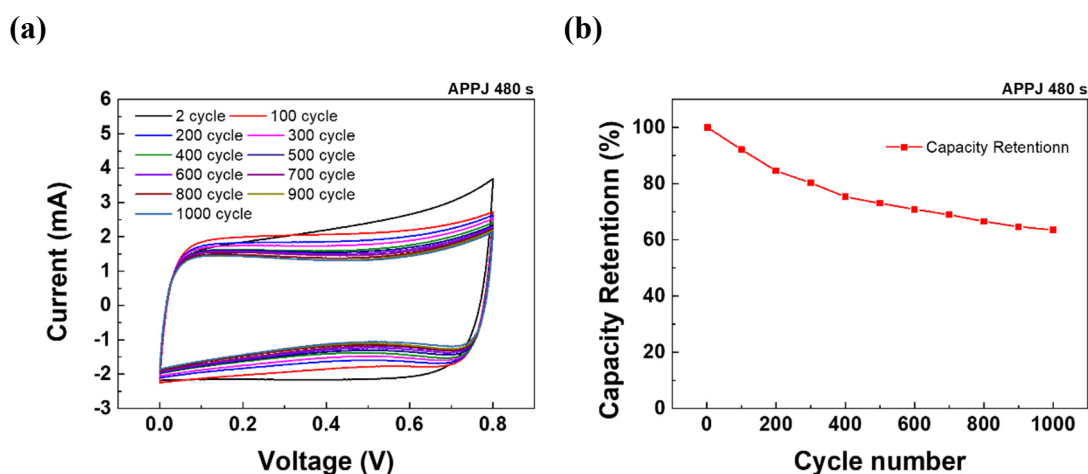

**Figure S5** Representative cycling stability curves of  $\text{Li}_2\text{SnO}_3$  Li-HSCs processed by APPJ for 480s in two-electrode symmetric system.

**Table S4** Capacity retention rate of Li<sub>2</sub>SnO<sub>3</sub> Li-HSCs in two-electrode symmetric system.

| Cycle number | Capacity Retention (%) |
|--------------|------------------------|
| 2            | 100                    |
| 100          | 92.16                  |
| 200          | 84.59                  |
| 300          | 80.29                  |
| 400          | 75.34                  |
| 500          | 73.02                  |
| 600          | 70.90                  |
| 700          | 68.99                  |
| 800          | 66.57                  |
| 900          | 64.69                  |
| 1000         | 63.56                  |
